# Supplementary material
Source: PubMed Central journal article supplement (PMC3822006)

A

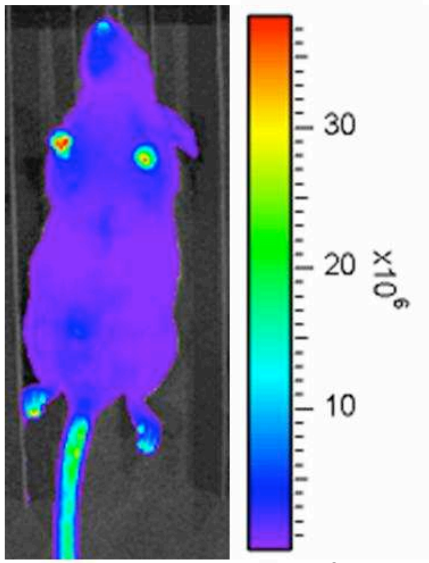

photons/sec/cm<sup>2</sup>/sr

B

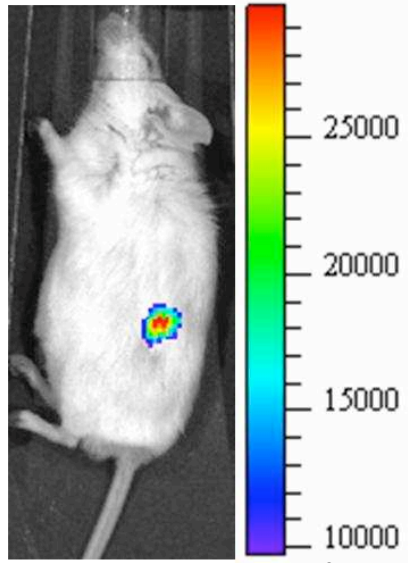

photons/sec/cm<sup>2</sup>/sr

Supplement: NIHMS492839-supplement-Supplemental_Figure_1.pdf [file NIHMS492839-supplement-Supplemental_Figure_1.pdf]

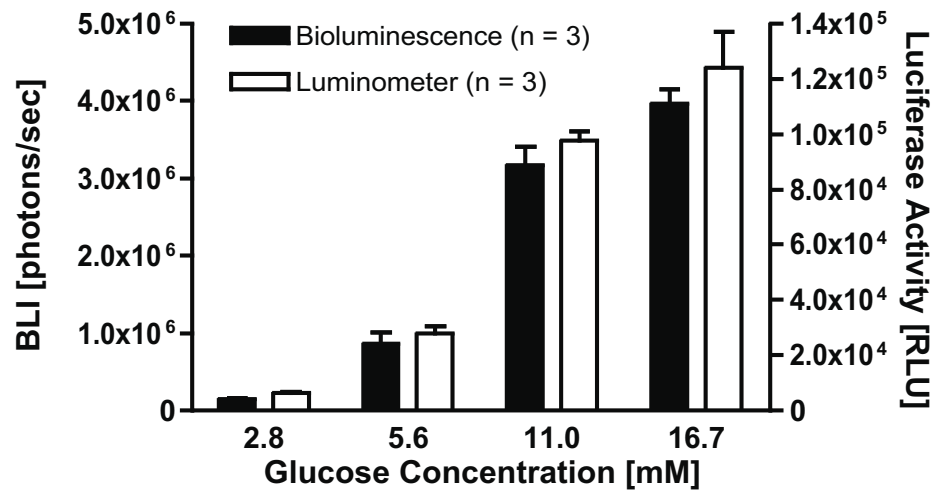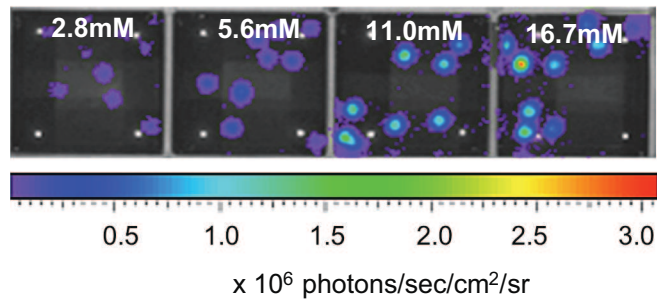

Supplementary Figure 2 - Virostko, et al.

Supplement: NIHMS492839-supplement-Supplemental_Figure_2.pdf [file NIHMS492839-supplement-Supplemental_Figure_2.pdf]

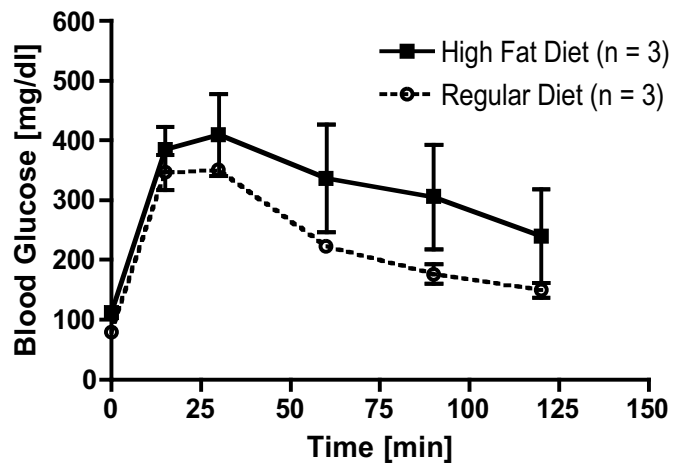

Supplement: NIHMS492839-supplement-Supplemental_Figure_3.pdf [file NIHMS492839-supplement-Supplemental_Figure_3.pdf]

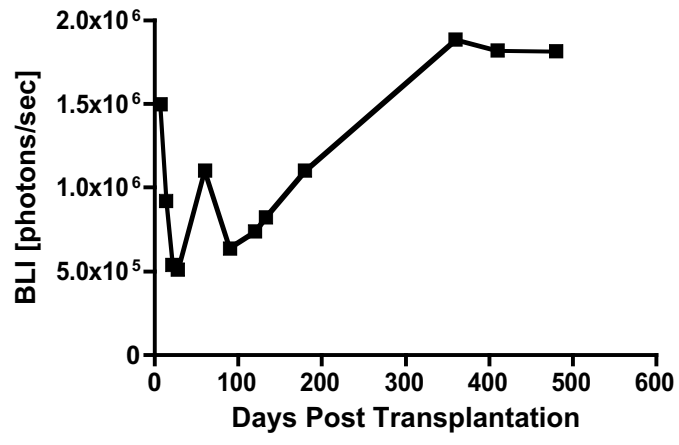

Supplementary Figure 4 - Virostko, et al.

Supplement: NIHMS492839-supplement-Supplemental_Figure_4.pdf [file NIHMS492839-supplement-Supplemental_Figure_4.pdf]
